# Supplementary material for: Physicochemical mechanotransduction alters nuclear shape and mechanics via heterochromatin formation
Source: PubMed Central journal article supplement — Mol Biol Cell. 2019 Aug 1;30(17):2320–30. doi: 10.1091/mbc.E19-05-0286 (PMC6743459; doi:10.1091/mbc.e19-05-0286), 2019-08-01

# Supplemental Materials

*Molecular Biology of the Cell*

Stephens et al.

## Supplemental Figure Legends

**Supplemental Figure 1. Increased extracellular divalent cations do not alter normal cell growth or characteristics.** (A) Viability measured by the absence of propidium iodide staining, which marks dead cells ( $n = 200 - 330$ ). MEF cells treated with VPA or null for lamin B1 (LB1<sup>-/-</sup>) in normal or MgCl<sub>2</sub> supplemented media display similar (B-D) nuclear sizedistribution (Pearson correlation coefficient  $r > 0.9$ ), (C) cell confluency and growth, and (D) actin cables running over the nucleus.(E) Western blot of MEF cells with and without MgCl<sub>2</sub> supplemented media and with or without mechanosensitive ion channel inhibitors GsMTx4 (GMT) and GdCl<sub>3</sub>. Scale bar = 10  $\mu$ m.

**Supplemental Figure 2. The extracellular amount of divalent or polyamine cations alters heterochromatin levels and nuclear blebbing over hours, but does not alter euchromatin levels.** (A) Western blot of MEF VPA plus increased extracellular CaCl<sub>2</sub>. (B) Western blot and (C) Immunofluorescence of euchromatin marker H3K9ac in MEF VPA-treated cells with added MgCl<sub>2</sub> ( $n > 50$  cells).(D) MEF nuclei treated with VPA for 24 hours, and then with continued VPA treatment and additional extracellular MgCl<sub>2</sub> 17.5 mM for 0, 2, and 8 hours were assayed for H3K27me<sup>3</sup> immunofluorescence signal and nuclear blebbing percentage ( $n > 50$  cells). (E) Relative immunofluorescence signal of heterochromatin markers in MEF LB1<sup>-/-</sup> with and without added extracellular MgCl<sub>2</sub>( $n = 2$  experiments,  $> 20$  cells). (F) HT1080 cells treated with VPA and extracellular MgCl<sub>2</sub> or (G) MEF cells treated with VPA and spermidine ( $n > 50$  cells). (H) Relative nuclear blebbing in MEF TSA-treated or MEF V<sup>-/-</sup> VPA-treated without or with increased extracellular divalent cations ( $n = 2-4$  experiments each  $> 100$  cells). (I) MEF cells treated with DZNep and additional extracellular MgCl<sub>2</sub> and labeled for heterochromatin markers via immunofluorescence ( $n = 3$  experiments,  $> 50$  cells each). (J) Graph of percentage of nuclei that exhibit nuclear rupture over 3 hours on average for MEF VPA, MEF LB1<sup>-/-</sup>, and HT1080 VPA with and without additional extracellular MgCl<sub>2</sub>( $n = 3$  experiments,  $>50$  cells each). (K) Relative nuclear size for MEF cells treated with either VPA or DZNep with increasing extracellular MgCl<sub>2</sub>for 24 hours ( $p > 0.05$ ,  $n = 3$  experiments,  $>50$  cells each). Error bars represent standard error. Asterisks denote statistically significant differences ( $p < 0.05$  or  $\chi = 0.05$ ).

**Supplemental Figure 3. HeLa GFP-progerin expressing cells display extracellular MgCl<sub>2</sub>-induced heterochromatin increase and rescued nuclear morphology dependent on mechanosensitive ion channels.** (A) Western blot of H3K27me<sup>3</sup> decrease upon GFP-Progerin and increase/rescue upon increased extracellular MgCl<sub>2</sub> in HeLa cells. (B) Graph of relative nuclear area for HeLa cells (GFP-Progerin and wild-type) and patient HGPS cells with and without additional extracellular MgCl<sub>2</sub>( $n \geq 3$  sets of  $> 50$  cells,  $p > 0.05$ ). (C) Relative nuclear irregularity index in HeLa GFP-progerin treated with just 17.5 mM extracellular MgCl<sub>2</sub> and co-treated with GsMTx4 mechanosensitive channel inhibitor ( $n = 3$  sets of  $>50$  cells each). Error bars represent standard error. Asterisks denote statistically significant differences\*\*\*  $p < 0.001$ ).

**A**

|         | MEF WT | MEF VPA | MEF LB1-/- |
|---------|--------|---------|------------|
| -       | 97.3%  | 100.0%  | 99.5%      |
| 7.5 mM  | 100.0% | 99.5%   | 100.0%     |
| 17.5 mM | 99.1%  | 99.7%   | 99.7%      |

**B**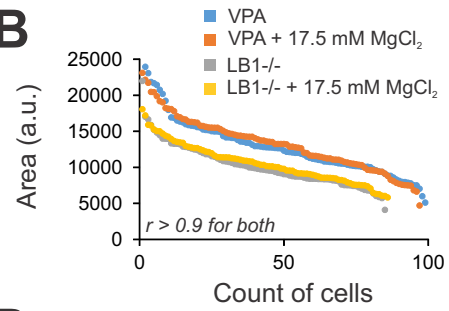**C**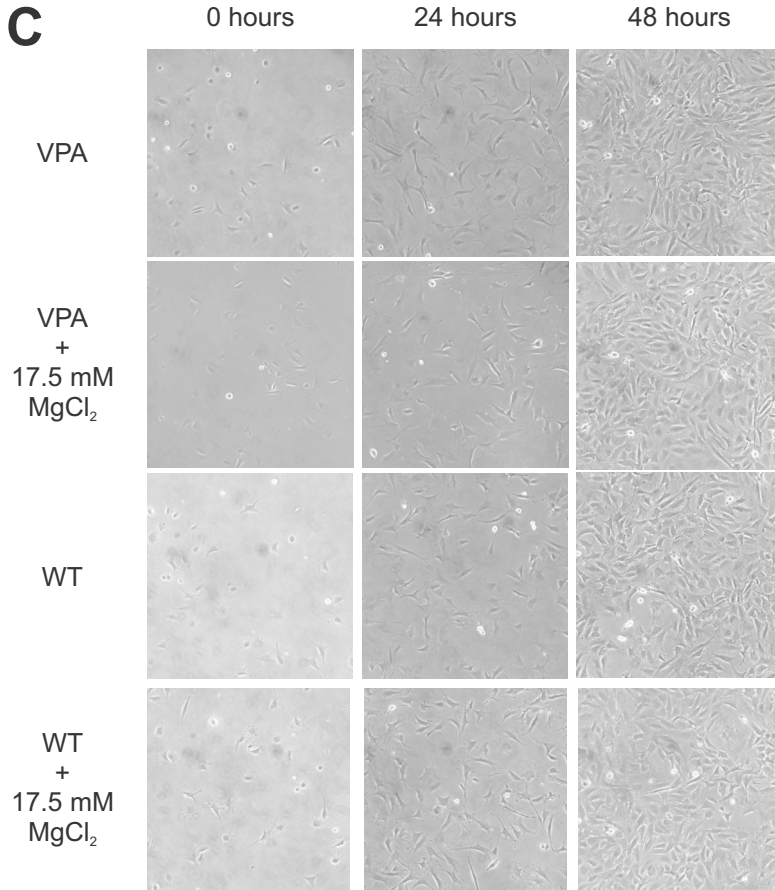**D**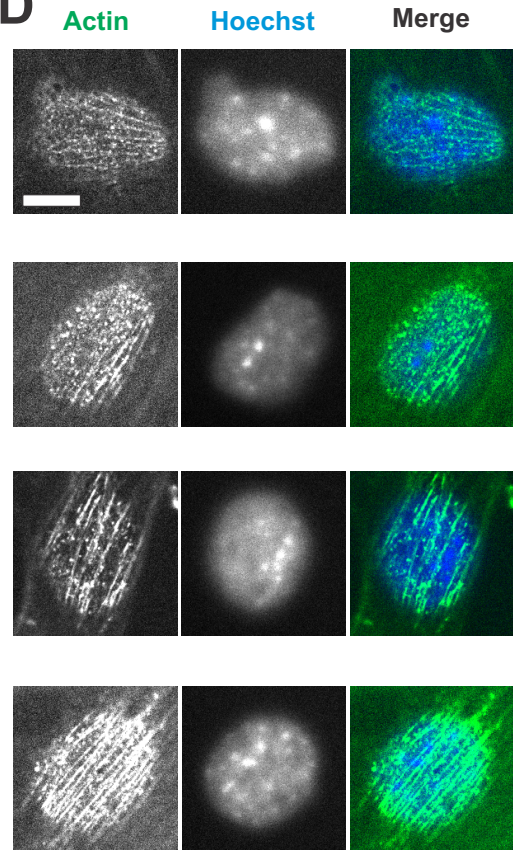**E**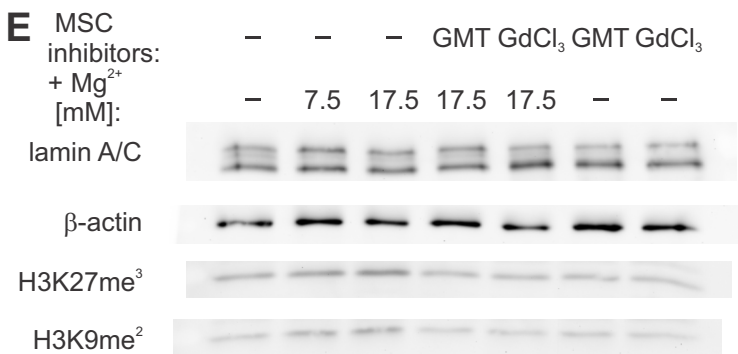

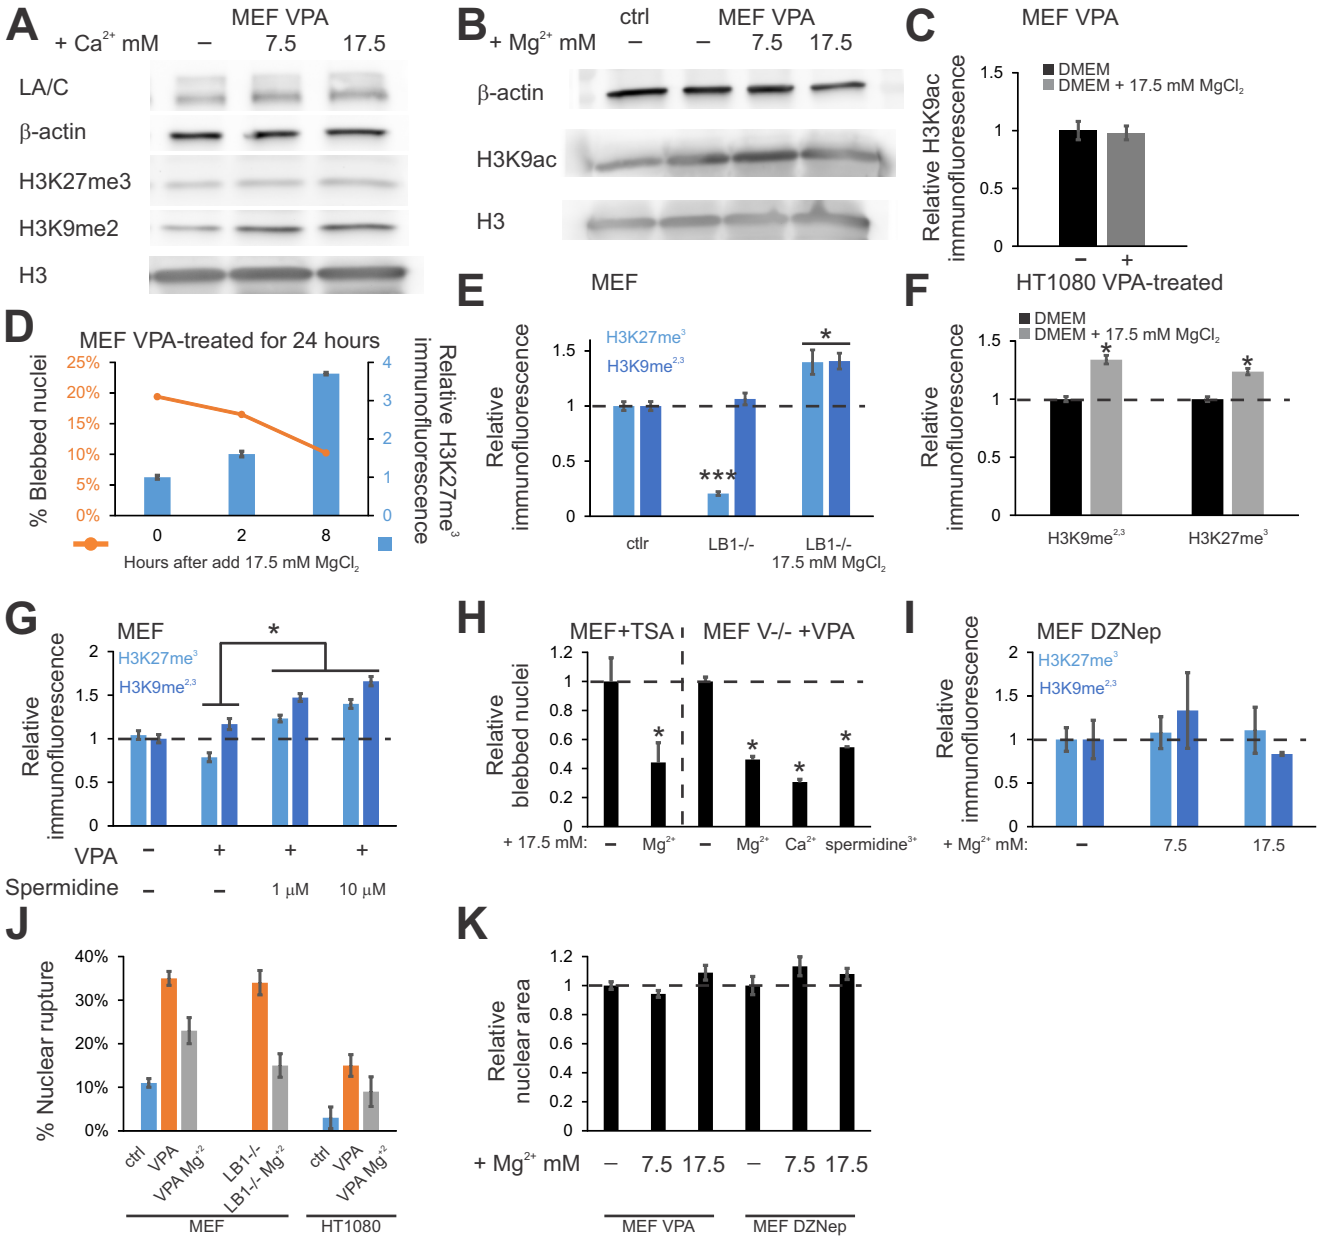

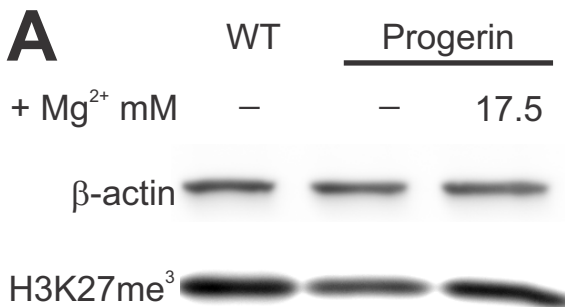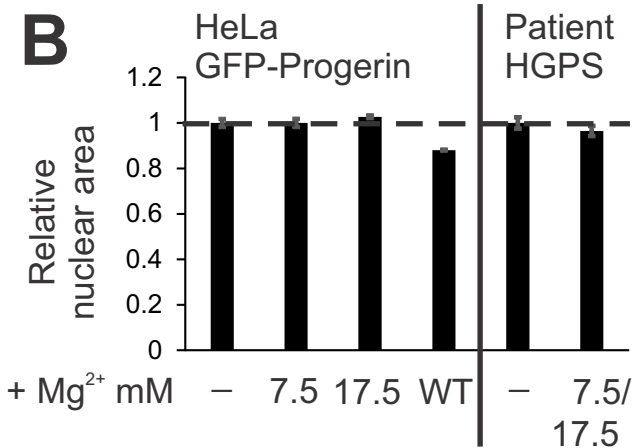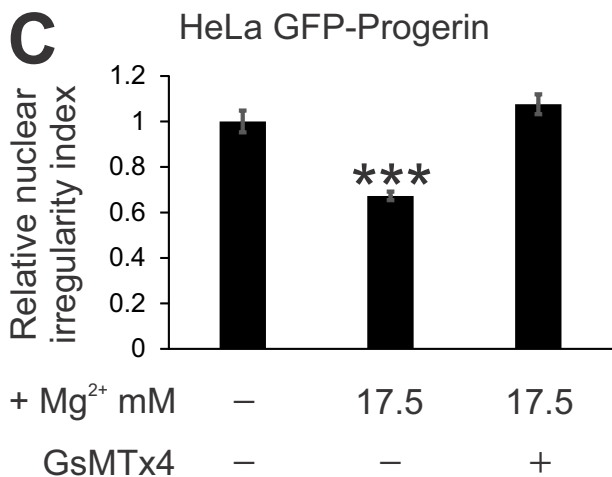

Supplement: mbc-30-2320-s001.pdf [file mbc-30-2320-s001.pdf]
